# Supplementary material for: Atomic structure of a voltage-dependent K+ channel in a lipid membrane-like environment
Source: Springer Nature journal article supplement (doi:10.1038/nature06265), 2007-11-15
Supplement: 41586_2007_BFnature06265_MOESM247_ESM.pdf [file 41586_2007_BFnature06265_MOESM247_ESM.pdf]

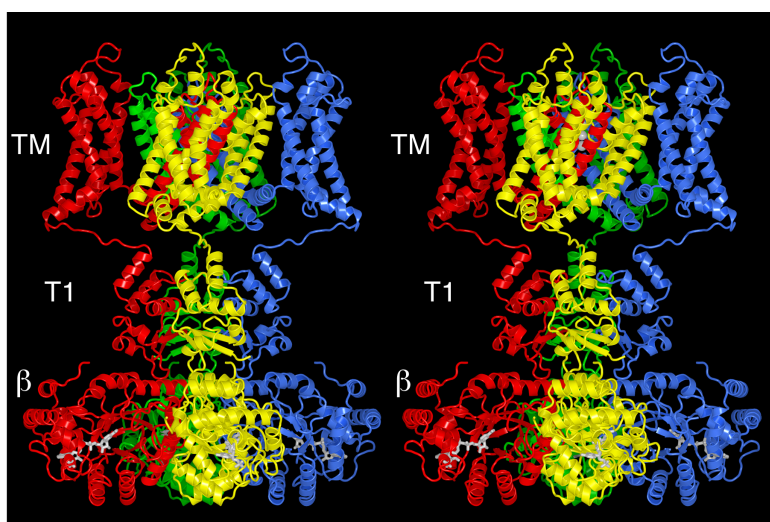

**Supplementary Figure 1. | Overall structure of the channel- $\beta$  subunit complex.** A ribbon representation from the side with the extracellular solution 'above' and the intracellular solution 'below', shown in stereo. Each subunit of the channel is colored uniquely. The  $\beta$  subunits are colored according to the channel subunit they contact. The NAD<sup>+</sup> cofactor bound to each  $\beta$  subunit is drawn as gray sticks. TM indicates the integral membrane component of the complex.

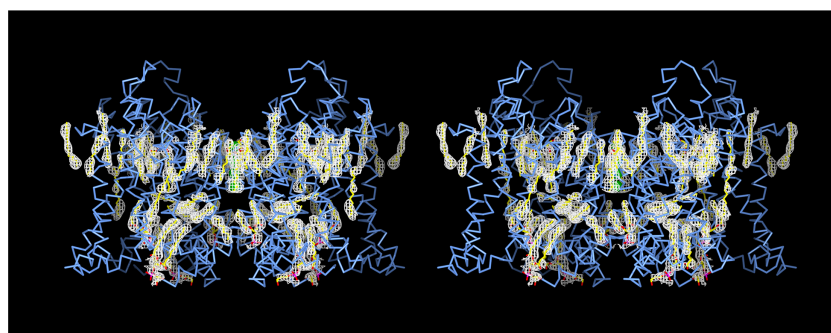

**Supplementary Figure 2. | Electron density for lipid molecules.** The view is of the transmembrane region of the channel from the side (extracellular solution 'above' and the intracellular solution 'below'), in stereo. The channel is drawn as blue  $\alpha$ -carbon trace. Electron density for lipid molecules is drawn as white mesh. The lipid molecules are shown as sticks and colored according to atom type (carbon, yellow; oxygen, red; phosphorous, magenta). Phases for the map were calculated by removing the lipid molecules from the coordinates and refining these modified coordinates using a simulated annealing protocol in the program CNS (38). This procedure, which is used to generate a 'simulated annealing omit map', minimizes bias in the map. The map has Fourier coefficients  $3F(\text{observed}) - 2F(\text{calculated})$ , and was calculated from 50-2.4 Å, contoured at  $1.0\sigma$ , and drawn around the lipid molecules.

## Supplementary Table | Data collection and refinement statistics

**Data collection**

|                             |                                |
|-----------------------------|--------------------------------|
| Spacegroup                  | P4 <sub>2</sub> 1 <sub>2</sub> |
| Cell parameters (Å)         | 144.0, 144.0, 284.4            |
| Source                      | NLSL X-29                      |
| Resolution (Å)              | 50.0 – 2.4                     |
| Wavelength (Å)              | 1.08 Å                         |
| No. of reflections (total)  | 278,768                        |
| No. of reflections (unique) | 112,726                        |
| Completeness (%)            | 96.0 (86.3) ‡                  |
| R <sub>sym</sub> (%) *      | 6.4 (43.6)                     |
| I/σ                         | 13.8 (1.4)                     |

**Refinement** (50-2.4 Å)

|                           |                                                                                                               |                                            |           |
|---------------------------|---------------------------------------------------------------------------------------------------------------|--------------------------------------------|-----------|
| No. of reflections        | 104,891                                                                                                       | No. of atoms                               | 11,816    |
| No. of molecules/ASU      | 2                                                                                                             | R <sub>work</sub> /R <sub>free</sub> (%) § | 21.2/24.4 |
| Bond length / angle †     | 0.01 Å / 1.4 °                                                                                                |                                            |           |
| Ramachandran              | 99.8 % (allowed region) / 0.02% (disallowed region)                                                           |                                            |           |
| Average protein B-factors |                                                                                                               |                                            |           |
| T1/β                      | molecule 1: 37.2 Å <sup>2</sup> ; molecule 2: 41.2 Å <sup>2</sup>                                             |                                            |           |
| pore                      | molecule 1: 45.8 Å <sup>2</sup> ; molecule 2: 71.0 Å <sup>2</sup>                                             |                                            |           |
| voltage sensor            | molecule 1: 64.0 Å <sup>2</sup> ; molecule 2: 148.0 Å <sup>2</sup>                                            |                                            |           |
| No. and average B-factors |                                                                                                               |                                            |           |
| waters                    | molecule 1: 193 waters, 41.9 Å <sup>2</sup><br>molecule 2: 126 waters, 39.0 Å <sup>2</sup>                    |                                            |           |
| lipid molecules           | molecule 1: 16 lipids (210 atoms), 84.1 Å <sup>2</sup><br>molecule 2: 1 lipid (22 atoms), 88.4 Å <sup>2</sup> |                                            |           |

\* R<sub>sym</sub> =  $\sum |I_i - \langle I_i \rangle| / \sum I_i$ , where  $\langle I_i \rangle$  is the average intensity of symmetry-equivalent reflections

§ R factor =  $\sum |F(\text{obs}) - F(\text{calc})| / \sum F(\text{obs})$ ; 5% of the data that were excluded from refinement were used in the R<sub>free</sub> calculation.

† r.m.s.d of bond is the root-mean-square-deviation of bond angle and length

‡ parentheses indicate outer resolution shell (2.5 - 2.4Å).
